# Supplementary material
Source: PubMed Central journal article supplement (PMC6547251)
Supplement: jamapediatr-173-736-s001.pdf [file jamapediatr-173-736-s001.pdf]

## Supplementary Online Content

Crump C, Howell EA, Stroustrup A, McLaughlin MA, Sundquist J, Sundquist K. Association of preterm birth with risk of ischemic heart disease in adulthood. *JAMA Pediatr*. Published online June 3, 2019. doi:10.1001/jamapediatrics.2019.1327

**eTable 1.** Summary of *ICD* codes and diagnoses included in the analyses.

**eTable 2.** Unadjusted hazard ratios for IHD risk associated with gestational age at birth, Sweden, 1973-2015.

**eTable 3.** Interactions between gestational age at birth and sex in relation to IHD risk at ages 18-43 years.

**eTable 4.** Interactions between gestational age at birth and fetal growth in relation to IHD risk at ages 18-43 years.

**eFigure.** Nelson-Aalen cumulative hazard functions for IHD by gestational age at birth, Sweden, 1973-2015.

**eTable 1. Summary of ICD codes and diagnoses included in the analyses.**

| <i>ICD-8</i> | <i>ICD-9</i>          | <i>ICD-10</i>        | Diagnoses                                                |
|--------------|-----------------------|----------------------|----------------------------------------------------------|
| 250          | 250                   | E10-E14              | Diabetes mellitus                                        |
| 400          | --                    | --                   | Malignant hypertension                                   |
| 401          | 401                   | I10                  | Essential benign hypertension                            |
| 402          | 402                   | I11                  | Hypertensive heart disease                               |
| 403          | 403                   | I12                  | Hypertensive renal disease                               |
| 404          | 404                   | I13                  | Hypertensive heart and renal disease                     |
| --           | 405                   | I15                  | Secondary hypertension                                   |
| 410          | 410                   | I21                  | Acute myocardial infarction                              |
| 411          | 411                   | I22-I24              | Other acute and subacute forms of ischemic heart disease |
| 412          | 412                   | I25                  | Chronic ischemic heart disease                           |
| 413          | 413                   | I20                  | Angina pectoris                                          |
| 414          | 414                   | --                   | Other forms of chronic ischemic heart disease            |
| 637          | 624.4-624.7           | O14-O15              | Preeclampsia                                             |
| --           | 642.0-642.3,<br>642.9 | O10-O11, O13,<br>O16 | Hypertension in pregnancy, childbirth and the puerperium |
| --           | 648.0                 | O24                  | Diabetes mellitus in pregnancy                           |
| 740-759      | 740-759               | Q00-Q99              | Congenital malformations                                 |

**eTable 2. Unadjusted hazard ratios for IHD risk associated with gestational age at birth, Sweden, 1973-2015.**

|                                  | All   |                   |                          | Men   |                   |                          | Women |                   |                          |
|----------------------------------|-------|-------------------|--------------------------|-------|-------------------|--------------------------|-------|-------------------|--------------------------|
|                                  | Cases | Rate <sup>a</sup> | HR (95% CI) <sup>b</sup> | Cases | Rate <sup>a</sup> | HR (95% CI) <sup>b</sup> | Cases | Rate <sup>a</sup> | HR (95% CI) <sup>b</sup> |
| <b>Attained ages 18-43 years</b> |       |                   |                          |       |                   |                          |       |                   |                          |
| Preterm (<37 wks)                | 126   | 8.79              | 1.55 (1.29, 1.87)        | 77    | 9.69              | 1.31 (1.04, 1.65)        | 49    | 7.67              | 1.99 (1.48, 2.68)        |
| Early preterm (<34 wks)          | 17    | 5.71              | 1.02 (0.63, 1.65)        | 9     | 5.45              | 0.75 (0.39, 1.44)        | 8     | 6.03              | 1.59 (0.79, 3.20)        |
| Late preterm (34-36 wks)         | 109   | 9.60              | 1.69 (1.39, 2.06)        | 68    | 10.80             | 1.45 (1.13, 1.86)        | 41    | 8.10              | 2.10 (1.52, 2.89)        |
| Early term (37-38 wks)           | 323   | 6.48              | 1.17 (1.04, 1.33)        | 221   | 8.32              | 1.14 (0.99, 1.33)        | 102   | 4.38              | 1.17 (0.94, 1.45)        |
| Full-term (39-41 wks)            | 1,247 | 5.85              | Reference                | 830   | 7.64              | Reference                | 417   | 3.99              | Reference                |
| Post-term (≥42 wks)              | 225   | 7.04              | 1.09 (0.94, 1.26)        | 157   | 9.55              | 1.14 (0.96, 1.35)        | 68    | 4.38              | 0.99 (0.77, 1.28)        |
| Per additional week (trend)      |       |                   | 0.96 (0.94, 0.98)        |       |                   | 0.98 (0.95, 1.01)        |       |                   | 0.93 (0.90, 0.97)        |
| <b>Attained ages 18-29 years</b> |       |                   |                          |       |                   |                          |       |                   |                          |
| Preterm (<37 wks)                | 52    | 4.98              | 1.46 (1.09, 1.94)        | 29    | 5.03              | 1.17 (0.80, 1.71)        | 23    | 4.92              | 1.95 (1.27, 3.01)        |
| Early preterm (<34 wks)          | 5     | 2.28              | 0.67 (0.28, 1.61)        | 3     | 2.48              | 0.58 (0.19, 1.81)        | 2     | 2.04              | 0.81 (0.20, 3.26)        |
| Late preterm (34-36 wks)         | 47    | 5.70              | 1.66 (1.23, 2.24)        | 26    | 5.71              | 1.33 (0.89, 1.98)        | 21    | 5.69              | 2.25 (1.44, 3.54)        |
| Early term (37-38 wks)           | 142   | 3.85              | 1.13 (0.94, 1.35)        | 100   | 5.14              | 1.20 (0.96, 1.50)        | 42    | 2.42              | 0.96 (0.69, 1.34)        |
| Full-term (39-41 wks)            | 520   | 3.42              | Reference                | 332   | 4.29              | Reference                | 188   | 2.52              | Reference                |
| Post-term (≥42 wks)              | 79    | 3.74              | 1.08 (0.85, 1.37)        | 54    | 4.92              | 1.14 (0.85, 1.51)        | 25    | 2.46              | 0.97 (0.64, 1.47)        |
| Per additional week (trend)      |       |                   | 0.97 (0.94, 1.01)        |       |                   | 0.98 (0.94, 1.03)        |       |                   | 0.96 (0.90, 1.03)        |
| <b>Attained ages 30-43 years</b> |       |                   |                          |       |                   |                          |       |                   |                          |
| Preterm (<37 wks)                | 74    | 18.99             | 1.63 (1.28, 2.07)        | 48    | 22.00             | 1.41 (1.04, 1.89)        | 26    | 15.16             | 2.02 (1.35, 3.04)        |
| Early preterm (<34 wks)          | 12    | 15.31             | 1.31 (0.74, 2.33)        | 6     | 13.64             | 0.87 (0.39, 1.95)        | 6     | 17.44             | 2.34 (1.04, 5.25)        |
| Late preterm (34-36 wks)         | 62    | 19.92             | 1.71 (1.32, 2.22)        | 42    | 24.12             | 1.54 (1.12, 2.11)        | 20    | 14.59             | 1.95 (1.23, 3.07)        |
| Early term (37-38 wks)           | 181   | 13.92             | 1.21 (1.03, 1.42)        | 121   | 17.08             | 1.10 (0.90, 1.34)        | 60    | 10.15             | 1.37 (1.03, 1.82)        |
| Full-term (39-41 wks)            | 727   | 11.86             | Reference                | 498   | 15.91             | Reference                | 229   | 7.64              | Reference                |
| Post-term (≥42 wks)              | 146   | 13.46             | 1.10 (0.92, 1.31)        | 103   | 18.79             | 1.14 (0.92, 1.41)        | 43    | 8.01              | 1.01 (0.73, 1.41)        |
| Per additional week (trend)      |       |                   | 0.95 (0.92, 0.98)        |       |                   | 0.98 (0.94, 1.01)        |       |                   | 0.92 (0.87, 0.96)        |

<sup>a</sup>IHD incidence rate per 100,000 person-years.

<sup>b</sup>Attained age was used as the Cox model time axis.

**eTable 3. Interactions between gestational age at birth and sex in relation to IHD risk at ages 18-43 years.**

|                                                                      | Gestational age at birth     |                          |                                    |                          |                                     |                          | HRs (95% CI)<br>for early term vs.<br>full-term within<br>sex strata | HRs (95% CI)<br>for preterm vs.<br>full-term within<br>sex strata |
|----------------------------------------------------------------------|------------------------------|--------------------------|------------------------------------|--------------------------|-------------------------------------|--------------------------|----------------------------------------------------------------------|-------------------------------------------------------------------|
|                                                                      | Full-term (39-41 wks)        |                          | Early term (37-38 wks)             |                          | Preterm (<37 wks)                   |                          |                                                                      |                                                                   |
|                                                                      | Rate <sup>a</sup><br>(Cases) | HR (95% CI) <sup>b</sup> | Rate <sup>a</sup><br>(Cases)       | HR (95% CI) <sup>b</sup> | Rate <sup>a</sup><br>(Cases)        | HR (95% CI) <sup>b</sup> |                                                                      |                                                                   |
| <b>Sex</b>                                                           |                              |                          |                                    |                          |                                     |                          |                                                                      |                                                                   |
| Female                                                               | 3.99<br>(417)                | Reference                | 4.38<br>(102)                      | 1.19 (0.96, 1.48)        | 7.67<br>(49)                        | 1.89 (1.40, 2.54)        | 1.19 (0.96, 1.48)                                                    | 1.89 (1.40, 2.54)                                                 |
| Male                                                                 | 7.64<br>(830)                | 1.92 (1.70, 2.16)        | 8.32<br>(221)                      | 2.19 (1.86, 2.58)        | 9.69<br>(77)                        | 2.39 (1.87, 3.05)        | 1.14 (0.97, 1.31)                                                    | 1.25 (0.95, 1.54)                                                 |
| HRs (95% CI) for<br>male vs. female within<br>gestational age strata |                              | 1.92 (1.70, 2.16)        |                                    | 1.85 (1.41, 2.28)        |                                     | 1.27 (0.81, 1.72)        |                                                                      |                                                                   |
| Interaction on additive scale: RERI (95% CI)                         |                              |                          | 0.09 (-0.31, 0.49); <i>P</i> =0.67 |                          | -0.41 (-1.19, 0.36); <i>P</i> =0.30 |                          |                                                                      |                                                                   |
| Interaction on multiplicative scale: HR ratio (95% CI)               |                              |                          | 0.96 (0.71, 1.22); <i>P</i> =0.77  |                          | 0.66 (0.41, 0.91); <i>P</i> =0.008  |                          |                                                                      |                                                                   |

<sup>a</sup>IHD incidence rate per 100,000 person-years.

<sup>b</sup>Adjusted for child characteristics (birth year, fetal growth, birth order, congenital anomalies) and maternal characteristics (age, education, birth country or region, BMI, smoking, preeclampsia, other hypertensive disorders, diabetes).

HR = hazard ratio, RERI = relative excess risk due to interaction

**eTable 4. Interactions between gestational age at birth and fetal growth in relation to IHD risk at ages 18-43 years.**

|                                                                              | Gestational age at birth     |                          |                                     |                          |                                    |                          | HRs (95% CI)<br>for early term vs.<br>full-term within<br>growth strata | HRs (95% CI)<br>for preterm vs.<br>full-term within<br>growth strata |
|------------------------------------------------------------------------------|------------------------------|--------------------------|-------------------------------------|--------------------------|------------------------------------|--------------------------|-------------------------------------------------------------------------|----------------------------------------------------------------------|
|                                                                              | Full-term (39-41 wks)        |                          | Early term (37-38 wks)              |                          | Preterm (<37 wks)                  |                          |                                                                         |                                                                      |
|                                                                              | Rate <sup>a</sup><br>(Cases) | HR (95% CI) <sup>b</sup> | Rate <sup>a</sup><br>(Cases)        | HR (95% CI) <sup>b</sup> | Rate <sup>a</sup><br>(Cases)       | HR (95% CI) <sup>b</sup> |                                                                         |                                                                      |
| <b>Fetal growth<sup>c</sup></b>                                              |                              |                          |                                     |                          |                                    |                          |                                                                         |                                                                      |
| Moderate (-1 to 1 SD<br>from mean)                                           | 4.47<br>(668)                | Reference                | 5.32<br>(191)                       | 1.28 (1.11, 1.49)        | 6.55<br>(69)                       | 1.52 (1.22, 1.90)        | 1.28 (1.11, 1.49)                                                       | 1.52 (1.22, 1.90)                                                    |
| Low (>1 SD below mean)                                                       | 7.37<br>(251)                | 1.26 (1.06, 1.50)        | 7.02<br>(41)                        | 1.24 (0.91, 1.70)        | 10.45<br>(21)                      | 1.85 (1.22, 2.81)        | 0.99 (0.68, 1.29)                                                       | 1.47 (0.87, 2.07)                                                    |
| HRs (95% CI) for low vs.<br>moderate fetal growth<br>within gest. age strata |                              | 1.26 (1.06, 1.50)        |                                     | 0.97 (0.65, 1.29)        |                                    | 1.22 (0.66, 1.78)        |                                                                         |                                                                      |
| Interaction on additive scale: RERI (95% CI)                                 |                              |                          | -0.30 (-0.73, 0.12); <i>P</i> =0.16 |                          | 0.07 (-0.75, 0.88); <i>P</i> =0.87 |                          |                                                                         |                                                                      |
| Interaction on multiplicative scale: HR ratio (95% CI)                       |                              |                          | 0.77 (0.51, 1.03); <i>P</i> =0.08   |                          | 0.96 (0.51, 1.41); <i>P</i> =0.88  |                          |                                                                         |                                                                      |

<sup>a</sup>IHD incidence rate per 100,000 person-years.

<sup>b</sup>Adjusted for child characteristics (birth year, fetal growth, birth order, congenital anomalies) and maternal characteristics (age, education, birth country or region, BMI, smoking, preeclampsia, other hypertensive disorders, diabetes).

<sup>c</sup>Fetal growth was defined as number of SD from mean birth weight for gestational age and sex based on Swedish reference intrauterine growth curves.

HR = hazard ratio, RERI = relative excess risk due to interaction

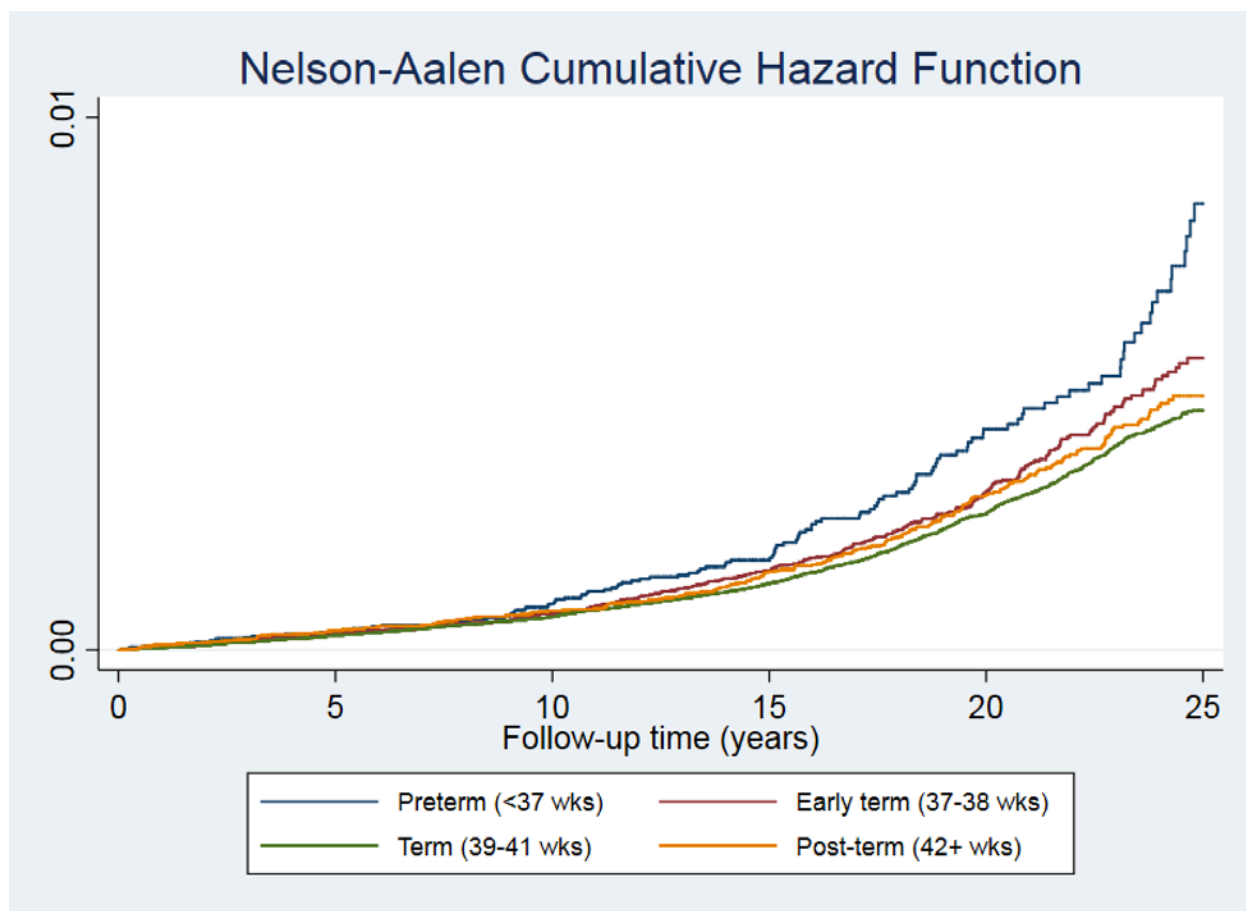

**eFigure 1. Nelson-Aalen cumulative hazard functions for IHD by gestational age at birth, Sweden, 1973-2015.**
